# Supplementary material for: COVID-19 and Acute Kidney Injury: A Systematic Review and Meta-Analysis
Source: PubMed Central journal article supplement (PMC7765425; doi:10.3390/pathogens9121052), 2020-12-15
Supplement: pathogens-09-01052-s001.pdf [file pathogens-09-01052-s001.pdf]

**Supplementary Table S1.** AKI according to severe COVID-19: Comorbidities.

| Authors                           | Diabetes Mellitus, <i>n</i> | Arterial Hypertension, <i>n</i> | Cardiovascular Disease, <i>n</i> |
|-----------------------------------|-----------------------------|---------------------------------|----------------------------------|
| HUANG Chaolin, <i>et al.</i>      | 8 (20%)                     | 6 (15%)                         | 6 (15%)                          |
| WANG Dawei, <i>et al.</i>         | 14 (10.1%)                  | 43 (31.2%)                      | 20 (14.5%)                       |
| XU Yonghao, <i>et al.</i>         | 13 (28.9%)                  | 21 (46.7%)                      | 6 (13.3%)                        |
| WAN Suxin, <i>et al.</i>          | 12 (8.9%)                   | 13 (9.6%)                       | 7 (5.2%)                         |
| LI Qiang, <i>et al.</i>           | 30 (9.2%)                   | 78 (24%)                        | 18 (5.5%)                        |
| XU Shen, <i>et al.</i>            | 147 (41.4%)                 | 125 (35.2%)                     | NA                               |
| LI Zhen, <i>et al.</i>            | NA                          | NA                              | NA                               |
| ZHAO Wen, <i>et al.</i>           | 6 (7.8%)                    | 16 (20.8%)                      | 9 (11.7%)                        |
| WANG Luwen, <i>et al.</i>         | 18 (15.5%)                  | 43 (37.1%)                      | NA                               |
| ZHANG Guqin, <i>et al.</i>        | 22 (10%)                    | 54 (24.4%)                      | 22 (10%)                         |
| LI Xiaochen, <i>et al.</i>        | 83 (15.1%)                  | 166 (30.3%)                     | 34 (6.2%)                        |
| JIANG Xiufeng, <i>et al.</i>      | 9 (16.4%)                   | 17 (30.9%)                      | 2 (3.6%)                         |
| HONG Kyung, <i>et al.</i>         | 9 (9.2%)                    | 30 (30.6%)                      | 11 (11.2%)                       |
| PEI Guangchang, <i>et al.</i>     | 76 (22.9%)                  | 107 (32.2%)                     | NA                               |
| GUAN Wej, <i>et al.</i>           | 81 (7.4%)                   | 165 (15%)                       | 27 (2.4%)                        |
| AGGARWAL Saurabh, <i>et al.</i>   | 5 (31%)                     | 9 (57%)                         | 7 (44%)                          |
| HU Ling, <i>et al.</i>            | 47 (14.6%)                  | 105 (32.5%)                     | 41 (12.7%)                       |
| CHAN Lili, <i>et al.</i>          | 800 (24.7%)                 | 1,193 (36.9%)                   | 281 (8.7%)                       |
| ZHENG Yi, <i>et al.</i>           | 8 (23.5%)                   | 22 (64.7%)                      | 4 (11.8%)                        |
| YANG Luhuan, <i>et al.</i>        | 21 (10.5%)                  | 45 (22.5%)                      | 11 (5.5%)                        |
| ARGENZIANO Michael, <i>et al.</i> | 333 (39.1%)                 | 525 (61.7%)                     | 206 (24.2%)                      |
| SULEYMAN Geehan, <i>et al.</i>    | 156 (43.9%)                 | 258 (72.7%)                     | 102 (28.7%)                      |

**Supplementary Table S2.** AKI and death risk in COVID-19: Comorbidities.

| Authors                          | Diabetes Mellitus, <i>n</i> | Arterial Hypertension, <i>n</i> | Cardiovascular Disease, <i>n</i> |
|----------------------------------|-----------------------------|---------------------------------|----------------------------------|
| YANG Xiaobo, <i>et al.</i>       | 9 (17%)                     | NA                              | 5 (10%)                          |
| LU Zhibing, <i>et al.</i>        | 14 (11.4%)                  | 41 (33.3%)                      | 20 (16%)                         |
| ZHOU Fei, <i>et al.</i>          | 36 (19%)                    | 58 (30.4%)                      | 15 (8%)                          |
| DENG Yan, <i>et al.</i>          | 26 (11.5%)                  | 58 (25.8%)                      | 17 (7.5%)                        |
| CHENG Yichun, <i>et al.</i>      | 100 (14.3%)                 | 233 (33.3%)                     | NA                               |
| LUO Xiaomin, <i>et al.</i>       | 57 (14.1%)                  | 113 (28%)                       | 36 (8.9%)                        |
| CAO Wen, <i>et al.</i>           | NA                          | NA                              | 20 (32.7%)                       |
| XU Shen, <i>et al.</i>           | 147 (41.4%)                 | 125 (35.2%)                     | NA                               |
| CHEN Tao, <i>et al.</i>          | 47 (17.1%)                  | 93 (33.9%)                      | 24 (8.8%)                        |
| WANG Lang, <i>et al.</i>         | 54 (15.9%)                  | 138 (40.7%)                     | 53 (15.7%)                       |
| RICHARDSON Safiya, <i>et al.</i> | 1808 (33.8%)                | 3026 (56.6%)                    | 966 (16.9%)                      |
| PEI Guangchang, <i>et al.</i>    | 76 (22.9%)                  | 107 (32.2%)                     | NA                               |
| CHAN Lili, <i>et al.</i>         | 800 (24.7%)                 | 1193 (36.9%)                    | 281 (8.7%)                       |
| WANG Dawei, <i>et al.</i>        | 11 (10.3%)                  | 26 (24.3%)                      | 13 (12.1%)                       |
| SHI Qiao, <i>et al.</i>          | 153 (50%)                   | 131 (42.8%)                     | 49 (16%)                         |
| HIRSCH Jamie, <i>et al.</i>      | 1797 (32.9%)                | 3037 (55.7%)                    | 949 (17.5%)                      |
| YANG Kunyu, <i>et al.</i>        | 22 (10.7%)                  | 67 (32.7%)                      | 16 (7.8%)                        |
| LIM Jeong-Hoon, <i>et al.</i>    | 50 (31%)                    | 77 (48%)                        | 31 (19.4%)                       |
| ZHAO Mengmeng, <i>et al.</i>     | 118 (11.8%)                 | 282 (28.2%)                     | 60 (6%)                          |
| PELAYO Jerald, <i>et al.</i>     | 104 (46.6%)                 | 180 (80.7%)                     | 35 (15.9%)                       |

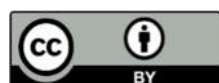

© 2020 by the authors. Licensee MDPI, Basel, Switzerland. This article is an open access article distributed under the terms and conditions of the Creative Commons Attribution (CC BY) license (<http://creativecommons.org/licenses/by/4.0/>).
